# Supplementary material for: Continuous Passive Motion Promotes and Maintains Chondrogenesis in Autologous Endothelial Progenitor Cell-Loaded Porous PLGA Scaffolds during Osteochondral Defect Repair in a Rabbit Model
Source: Int J Mol Sci. 2019 Jan 10;20(2):259. doi: 10.3390/ijms20020259 (PMC6358980; doi:10.3390/ijms20020259)
Supplement: Supplementary file 1 [file ijms-20-00259-s001.pdf]

**Supplementary Table 1.** Modified Wayne's grading scale scoring system for gross appearance.

| Macroscopic Appearance        | Description                     | Points |
|-------------------------------|---------------------------------|--------|
| 1. Coverage                   | >75% filled                     | 4      |
|                               | 50–75% filled                   | 3      |
|                               | 25–50% filled                   | 2      |
|                               | <25% filled                     | 1      |
|                               | 0% filled                       | 0      |
| 2. Tissue Color               | Normal/whitish                  | 4      |
|                               | 25% yellow/brown/reddish/white  | 3      |
|                               | 50% yellow/brown/reddish/white  | 2      |
|                               | 75% yellow/brown/reddish/white  | 1      |
|                               | 100% yellow/brown/reddish/white | 0      |
| 3. Surface (smoothness level) | Normal                          | 4      |
|                               | Smooth but raised               | 3      |
|                               | 25–50% irregular                | 2      |
|                               | 50–75% irregular                | 1      |
|                               | >75% irregular                  | 0      |
| Total score                   | For full evaluations            | 12     |
